# Supplementary material for: Examining internal migration effects on short versus long interbirth intervals in Cotonou, Benin Republic
Source: BMC Pregnancy Childbirth. 2019 Oct 23;19:375. doi: 10.1186/s12884-019-2529-7 (PMC6813098; doi:10.1186/s12884-019-2529-7)
Supplement: Supplementary file 1 — Additional file 1. Household questionnaire. This supplementary file is an MS Excel workbook that presents the household questionnaire. [file 12884_2019_2529_MOESM1_ESM.xlsx]

## Sheet: HH
Household questionnaire
COTONOU 2018 FERTILITY AND MIGRATION SURVEY
		HOUSEHOLD INFORMATION PANEL																																											HH
		HH0.			Place:
		HH1.			Cluster number:						.
		HH2.			Household number:							.
		We are from the Panafrican University. We are conducting a survey about the situation of children, families and households. I would like to talk to you about these subjects. The interview will take about 10-15 minutes. All the information we obtain will remain strictly confidential and anonymous. May I start now?
					Yes, permission is given ➤ Go to HH11 to record the time and then begin the interview.
					No, permission is not given ➤ Circle 04 in HH3. Discuss this result with your supervisor.
		HH3.			Result of household interview:
					Completed					.																																				01
					No household member or no competent respondent at home at time of visit																											.														02
					Entire household absent for extended period of time																			.																						03
					Refused				.																																					04
					Dwelling vacant / Address not a dwelling															.																										05
					Dwelling destroyed								.																																	06
					Dwelling not found								.																																	07
					Other (Specify)																																									96
		After the household questionnaire has been completed, fill in the following information:
		HH4.			Interviewer's name and number:
		HH5.			Respondent to Household Questionnaire:
		HH6.			Day / Month / Year of interview:
		HH7.			Total number of household members:
		HH8.			Number of women age 15-64
		HH9.			Number of women's questionnaires completed:
		HH10.			Field editor’s name and number:
		HH11.			Record the time
							Hours									Minutes

## Sheet: HL
			LISTE OF HOUSEHOLD MEMBERS																																											HL
			First, please tell me the name of each person who usually lives here, starting with the head of the household.
				List the head of the household in line 01. List all household members (HL2), their relationship to the
				household head (HL3), and their sex (HL4)
			Then ask: Are there any others who live here, even if they are not at home now?
					If yes, complete listing for questions HL2-HL4. Then, ask questions starting with HL5 for each person at a time.
					Use an additional questionnaire if all rows in the List of Household Members have been used.
		HL1.			HL2.							HL3.						HL4.					HL5.																	HL6.					HL7.
		Line			Name						What is the						Is (name)						What is (name)'s date of birth?																How old is
		n˚									relationship						male of																						(name)?
											of (name) with						female?
											the head of
											household?																												Record in					Circle
																																							completed					line n˚ if
																	1. Male						98 DK						9998 DK										years.					woman
																	2. Female																						If age is 95					age
																																							or above,					15-64
																																							record '95'
		Line		Name							Relation*						M			F			Month						Year									Age						15-64
		01		.									01					1		2																									01
		02		.														1		2																									02
		03		.														1		2																									03
		04		.														1		2																									04
		05		.														1		2																									05
		06		.														1		2																									06
		07		.														1		2																									07
		08		.														1		2																									08
		09		.														1		2																									09
		10		.														1		2																									10
			Tick here if additional questionnaire used																				Probe for additional household members.
																							Probe especially for any infants or small children not listed, and others who may not be members of the family (such as servants, friends) but who usually live in the household.
		*Code for HL3: Relationship to head of household
																							Insert names of additional members in the household list and complete form accordingly.
		01		Head
		02		Spouse / Partner
		03		Son / Daughter																			Now for each woman age 15-64 years, write her name and line number and other identifying information in the information panel of a separate Individual Women’s Questionnaire.
		04		Son-In-Law / Daughter-In-Law
		05		Grandchild
		06		Parent
		07		Parent-In-Law
		08		Brother / Sister
		09		Brother-In-Law / Sister-In-Law												13		Adopted / Foster/ Stepchild
		10		Uncle / Aunt												14		Servant (Live-in)
		11		Niece / Nephew												96		Other (Not related)
		12		Other relative												98		DK
